# Supplementary material for: MIWI and piRNA-mediated cleavage of messenger RNAs in mouse testes
Source: PubMed Central journal article supplement — Cell Res. 2015 Jan 13;25(2):193–207. doi: 10.1038/cr.2015.4 (PMC4650574; doi:10.1038/cr.2015.4), 2015-01-13
Supplement: cr20154x8.pdf [file cr20154x8.pdf]

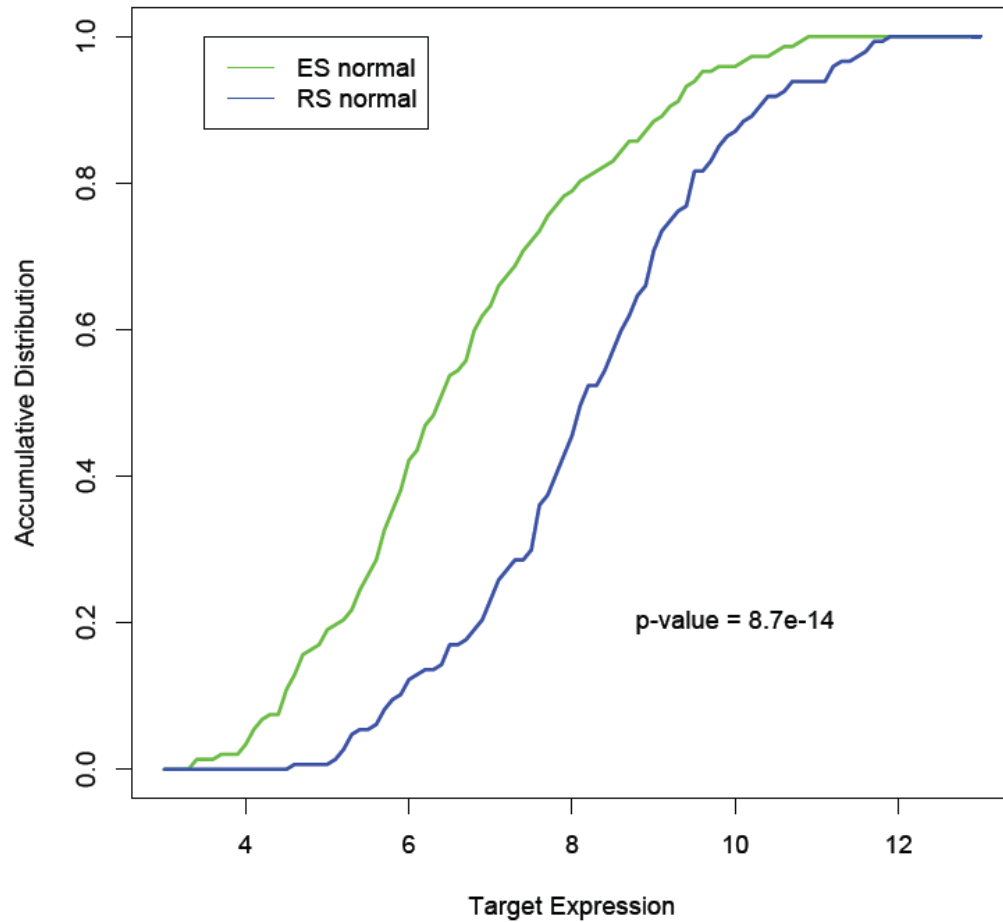

**Supplementary information, Figure S8** Accumulative distribution of expression levels of piRNA target genes in round spermatids (RS, GSE32180) and elongating spermatids (ES, GSE59291). The gene expression is presented as the averaged log<sub>2</sub> expression of two replicates in each case. The *p* value represent Wilcoxon rank sum test between RS normal and ES normal samples.
